# Supplementary material for: Patient-Reported Symptom Relief Following Medical Cannabis Consumption
Source: PubMed Central journal article supplement (PMC6121171; doi:10.3389/fphar.2018.00916), 2018-08-28

Figure S1. Frequency of Levels of Symptom Relief

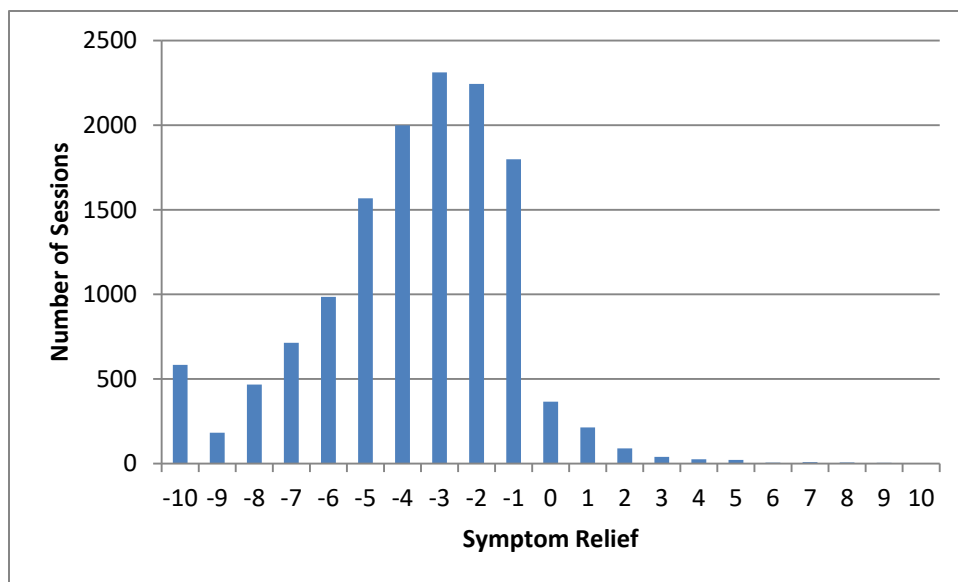

Supplement: Image_1.pdf [file Image_1.pdf]
