# Supplementary material for: Patient-Reported Symptom Relief Following Medical Cannabis Consumption
Source: PubMed Central journal article supplement (PMC6121171; doi:10.3389/fphar.2018.00916), 2018-08-28

Figure S2. Symptom Relief by Starting Symptom Level and Symptom Category

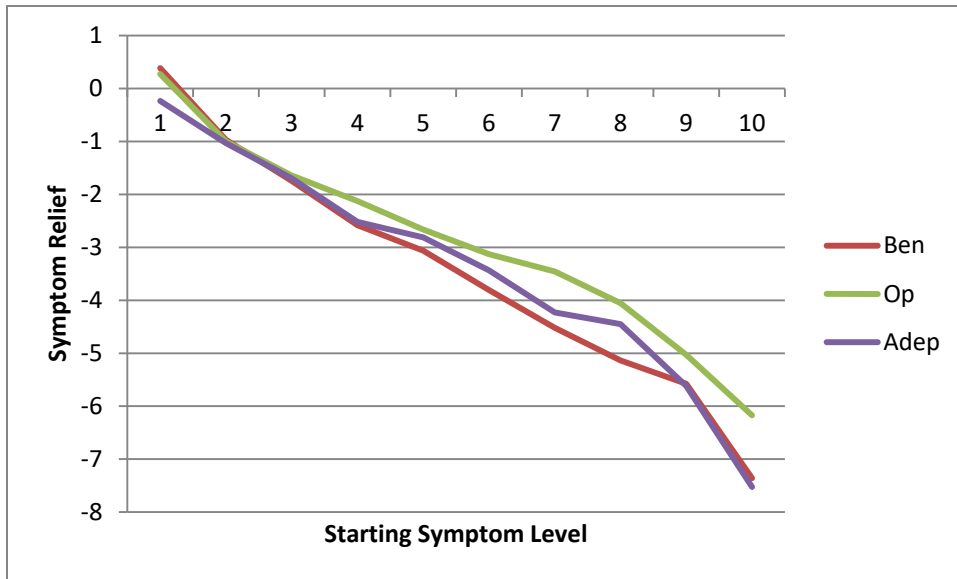

Supplement: Image_2.pdf [file Image_2.pdf]
